RESEARCH ARTICLE

# Determinants of magnesium sulphate use in women hospitalized at <29 weeks with severe or non-severe pre-eclampsia

Dane A. De Silva<sup>1</sup>, Lily Proctor<sup>1</sup>, Peter von Dadelszen<sup>2,3</sup>, Meghan McCoach<sup>1</sup>, Tang Lee<sup>1</sup>, the Canadian Perinatal Network (CPN) Collaborative Group<sup>¶</sup>, Laura A. Magee<sup>2,3\*</sup>

**1** Department of Obstetrics & Gynaecology, University of British Columbia, Vancouver, Canada,

**2** Department of Women and Children's Health, St Thomas' Hospital, London, United Kingdom, **3** School of Life Course Sciences, Faculty of Life Sciences and Medicine, King's College London, London, United Kingdom

¶ Complete membership of the Canadian Perinatal Network (CPN) Collaborative Group can be found in the Acknowledgments.

\* [Laura.A.Magee@kcl.ac.uk](mailto:Laura.A.Magee@kcl.ac.uk)

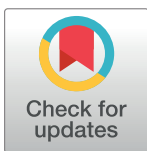

**OPEN ACCESS**

**Citation:** De Silva DA, Proctor L, von Dadelszen P, McCoach M, Lee T, the Canadian Perinatal Network (CPN) Collaborative Group, et al. (2017) Determinants of magnesium sulphate use in women hospitalized at <29 weeks with severe or non-severe pre-eclampsia. *PLoS ONE* 12(12): e0189966. <https://doi.org/10.1371/journal.pone.0189966>

**Editor:** Stefan Gebhardt, Stellenbosch University, SOUTH AFRICA

**Received:** May 10, 2017

**Accepted:** December 5, 2017

**Published:** December 22, 2017

**Copyright:** © 2017 De Silva et al. This is an open access article distributed under the terms of the [Creative Commons Attribution License](https://creativecommons.org/licenses/by/4.0/), which permits unrestricted use, distribution, and reproduction in any medium, provided the original author and source are credited.

**Data Availability Statement:** The full anonymised dataset is available as supplementary information.

**Funding:** The CPN was funded by the Canadian Institutes of Health Research (LAM, MOP-74720) and Ontario Ministry of Long-term Care. The funders had no role in study design, data collection and analysis, decision to publish, or preparation of the manuscript.

## Abstract

### Objective

Magnesium sulphate is recommended by international guidelines to prevent eclampsia among women with pre-eclampsia, especially when it is severe, but fewer than 70% of such women receive magnesium sulphate. We aimed to identify variables that prompt Canadian physicians to administer magnesium sulphate to women with pre-eclampsia.

### Methods

Data were used from the Canadian Perinatal Network (2005–11) of women hospitalized at <29 weeks' who were thought to be at high risk of delivery due to pre-eclampsia (using broad Canadian definition). Unadjusted analyses of relative risks were estimated directly and population attributable risk percent (PAR%) calculated to identify variables associated with magnesium sulphate use. A multivariable model was created and a generalized estimating equation was used to estimate the adjusted RR that explained magnesium sulphate use in pre-eclampsia. The adjusted PAR% was estimated by bootstrapping.

### Results

Of 631 women with pre-eclampsia, 174 (30.1%) had severe pre-eclampsia, of whom 131 (75.3%) received magnesium sulphate. 457 (69.9%) women had non-severe pre-eclampsia, of whom 291 (63.7%) received magnesium sulphate. Use of magnesium sulphate among women with pre-eclampsia could be attributed to the following clinical factors (PAR %): delivery for 'adverse conditions' (48.7%), severe hypertension (21.9%), receipt of antenatal corticosteroids (20.0%), maternal transport prior to delivery (9.9%), heavy proteinuria (7.8%), and interventionist care (3.4%).

**Competing interests:** The authors have declared that no competing interests exist.

## Conclusions

Clinicians are more likely to administer magnesium sulphate for eclampsia prophylaxis in the presence of more severe maternal clinical features, in addition to concomitant antenatal corticosteroid administration, and shorter admission to delivery periods related to transport from another institution or plans for interventionist care.

## Introduction

Magnesium sulphate is effective for treatment of eclampsia [1]. The Magpie Trial demonstrated that magnesium sulphate could halve the rate of seizures among women with pre-eclampsia [2]. Magnesium sulphate was equally effective for severe and non-severe pre-eclampsia, although treatment of women with non-severe pre-eclampsia required a high number-needed-to-treat (NNT) to prevent one seizure (i.e., 100 vs. 50) and at a higher cost (US \$21,202 vs. \$12,942) compared to severe pre-eclampsia [3]. In well-resourced settings, this has led to recommendations to administer magnesium sulphate to all women with 'severe' pre-eclampsia, and consider doing so to women with non-severe disease. In under-resourced settings, similar recommendations have been made by the World Health Organization (WHO), citing that magnesium sulphate may not be available for all women [4].

In the seminal Magpie Trial, the definition of severe pre-eclampsia was based on severe hypertension and heavier proteinuria ( $\geq 3+$ ), or less severe hypertension associated with findings of 'imminent eclampsia' for which there is no standard definition but is usually interpreted as central nervous system symptoms or hyperreflexia [2]. This definition of severe disease does not align well with current international definitions between which there is also substantial variability from country to country, and within countries over time [5].

In Canada, the 1997 national pregnancy hypertension guidance, pre-eclampsia was broadly defined as gestational hypertension with proteinuria or an adverse condition(s) that consisted of relevant maternal symptoms, signs, or abnormal laboratory tests, or relevant fetal manifestations; 'severe' pre-eclampsia was not defined [6–8]. In the 2008 update, 'severe' pre-eclampsia was defined as gestational hypertension with proteinuria *and* an 'adverse condition(s)' as defined previously [9]. In the 2014 update, 'severe' pre-eclampsia was defined according to the presence of an indication for delivery—a severe complication(s) for the mother or fetus [10,11]. Magnesium sulphate was recommended for all women in 1997, and then in 2008 and 2014, all women with 'severe' pre-eclampsia, with consideration to be given to also administering magnesium sulphate to women with 'non-severe' disease.

In the international Pre-eclampsia Integrated Estimate of RiSk (PIERS) study that aimed to find predictors of adverse maternal outcome among women admitted to hospital with pre-eclampsia, magnesium sulphate was administered to only 62% of 261 women who were both hospitalized with pre-eclampsia and suffered an adverse maternal outcome that would meet any international definition of 'severe' disease, suggesting that clinicians may be using criteria other than strict definitions of 'severe' or 'non-severe' disease to guide therapy [12]. The aim of our study was to identify factors that influence magnesium sulphate administration to women with pre-eclampsia in Canadian tertiary perinatal centres.

## Materials and methods

The Canadian Perinatal Network (CPN) is a database of women admitted to 16 tertiary care centres in Canada (August 2005 to March 2011) at 22<sup>+0</sup> to 28<sup>+6</sup> weeks gestation because of

threatened preterm birth. These women were admitted with one or more of: spontaneous preterm labour with contractions, preterm pre-labour rupture of membranes (PPROM), short cervix without contractions, prolapsing membranes, gestational hypertension, intrauterine fetal growth restriction (IUGR), or antepartum haemorrhage. This study was approved centrally as a quality assurance project at the University of British Columbia (H05-70359) and at each participating site's Research Ethics Board. Details of the CPN study have been published previously [13].

In this analysis, we included women who presented to a participating CPN site with pre-eclampsia/eclampsia (before 29 weeks) as their primary indication for admission. Pre-eclampsia was defined broadly as gestational hypertension with proteinuria, or one or more of relevant pre-eclampsia maternal symptoms, signs or abnormal laboratory tests; this definition was consistent with the 1997, 2008, and 2014 national guidance in Canada, as published by the Society of Obstetricians and Gynaecologists of Canada (SOGC) [5–11].

The primary outcome was magnesium sulphate administration for pre-eclampsia/eclampsia, antenatally or postnatally (S1 File).

Descriptive statistics were used to compare the characteristics of women who received magnesium sulphate, with those who did not, using the Chi-square (categorical variables) and Mann-Whitney U tests (continuous variables), with a  $p$ -value  $< 0.05$  considered to be statistically significant. As the primary outcome of magnesium sulphate use was a common occurrence, univariable analyses of relative risks (RR) were estimated directly using generalized linear models with a binomial distribution and a log link instead of calculating odds ratios (OR) (as an OR would be expected to overestimate the RR with a common outcome).

For inclusion in the multivariable model, we tested candidate variables that were either associated with magnesium sulphate use at  $p < 0.10$  or differed among women treated with magnesium sulphate (vs. those who were not) by an absolute amount that could be clinically important and identify lost therapeutic opportunities that could be addressed to improve magnesium sulphate use and outcomes. As such, variables that occurred infrequently (among  $< 5$  women) were not included. Continuous variables, such as maternal age and blood pressure, were collapsed into meaningful categories, and some inter-related outcomes were combined (e.g., fetal syndrome of pre-eclampsia) in order to avoid problems of model convergence. The variables were reviewed to identify those with the highest RR and eliminate those that were likely to be highly intercorrelated with other included variables to create the most parsimonious model. The final list of variables was determined through expert opinion from obstetric medicine, obstetrics, and epidemiology.

A final generalized estimating equation was used to account for the multicentre design of CPN and estimate the adjusted RR that explained magnesium sulphate use. Adjusted Population Attributable Risk percent (PAR%) was calculated for each variable in the model to identify determinants of magnesium sulphate use. PAR% for a variable was interpreted as the proportion of magnesium sulphate use that was attributable to that variable, noting that the PAR% for different variables are not additive [14]. The 95% CI for the adjusted PAR% were estimated by bootstrapping methods [15].

All statistical analyses were performed using R statistical software ([www.r-project.org](http://www.r-project.org)).

In sensitivity analyses, we explored the impact of: (i) adding as a determinant pre-eclampsia severity defined according to the 2014 SOGC HDP guidelines [9,10], defined in detail in **Table A in S2 File**; and (ii) excluding variables that were assumed to have been present prior to magnesium sulphate use, but that were not time-stamped: (a) severe hypertension that was replaced by severe hypertension therapy (with parenteral hydralazine or labetalol, or nifedipine capsules or intermediate-acting tablets) that was time-stamped, and (b) severe hypertension and heavy proteinuria; and (iii) restricting the analysis to intrapartum/postpartum therapy to examine the impact of variables that were antepartum but not time-stamped.

## Results

There were 631 eligible women who were at 22<sup>+0</sup> and 28<sup>+6</sup> weeks gestation when admitted to one of 16 CPN participating tertiary perinatal centres for pre-eclampsia care. 422 (66.9%) women received magnesium sulphate for eclampsia prophylaxis.

**Table 1** presents the baseline maternal and pregnancy characteristics of the women included. Women who received magnesium sulphate (compared with those who did not) differed according to most admission maternal and pregnancy characteristics. These women were more frequently: younger in age, nulliparous, had a history of gestational hypertension, and demonstrated more severe maternal clinical features of pre-eclampsia, in terms of higher BP, heavier proteinuria, and more frequent serious maternal end-organ complications (for details, see **Table B in S2 File**). Of note, these women treated with magnesium sulphate were less likely to have fetal manifestations and stillbirth. They also had shorter admission to delivery intervals and delivered at an earlier gestational age and more often by Caesarean.

**Table 2** outlines the 15 variables considered for the final model of factors associated with magnesium sulphate use in pre-eclampsia. The following variables were excluded: (i) prior venous thromboembolism (as it was very uncommon); (ii) prior gestational hypertension (as it would not apply to nulliparous women); (iii) gestational age on admission or delivery (as the difference was not clinically significant, and the majority of these women delivered very pre-term); (iv) peak systolic and diastolic BP (in favour of severe hypertension); (v) any, as opposed to heavy, proteinuria (because almost all women had some proteinuria and there was a larger difference between groups in heavy proteinuria); (vi) whether this was the woman's first admission and latency from enrolment to delivery, both of which were accounted for by interventionist care; and (vii) mode of delivery (as the key decision point is the timing of delivery as spontaneous or induced). Also, fetal manifestations of pre-eclampsia were combined into one 'fetal syndrome' variable, and delivery for maternal symptoms and signs combined to create a parsimonious model.

The adjusted RR and PAR% and associated 95% confidence intervals show that there were six factors that were independently associated with magnesium sulphate use. The strongest related to maternal symptoms and signs of maternal disease (PAR% of 48.6%) or severe hypertension (PAR% of 21.9%).

In sensitivity analyses, the final model changed little. The SOGC classification of the severity of pre-eclampsia [i.e., 190 (30.1%) women with 'severe' pre-eclampsia among whom 139 (73.2%) received magnesium sulphate, and 441 (69.9%) with non-severe pre-eclampsia of whom 283 (64.2%) received magnesium sulphate] was not independently associated with magnesium sulphate use when added to the final model (**Table C in S2 File**). Replacement of severe hypertension with severe hypertension therapy caused heavy proteinuria (which had been of borderline statistical significance before, but significant) to be dropped, and singleton pregnancy to emerge (that had been of borderline statistical significance before, but not significant) (**Table D in S2 File**). When severe hypertension and heavy proteinuria were excluded, singleton pregnancy again emerged as significant (**Table E in S2 File**). Only when analysis was restricted to antepartum predictors and intrapartum/postpartum magnesium sulphate delivery did maternal transport prior to delivery and interventionist care fall out of the model, but delivery for the fetal syndrome of pre-eclampsia emerged as a significant negative predictor (i.e., of NOT receiving magnesium) (**Table F in S2 File**); the direction of effect was the same in the final model and other sensitivity analyses, but they were not statistically significant. Confidence intervals were wide.

**Table 1. Demographic and clinical characteristics of women with severe/non-severe pre-eclampsia according to MgSO4 use (N = 631).**

|                                                                    | MgSO4 use N = 422 | No MgSO4 use N = 209 | Unadjusted RR (95% CI) | p-value |
|--------------------------------------------------------------------|-------------------|----------------------|------------------------|---------|
| <b>Demographic and clinical characteristics in index pregnancy</b> |                   |                      |                        |         |
| Maternal age (yr)                                                  | 30.0 [26.0, 35.0] | 33.0 [29.0, 37.0]    | -                      | <0.001  |
| ≤24                                                                | 76 (18.0%)        | 17 (8.1%)            | 1.26 (1.09, 1.45)      |         |
| 25–29                                                              | 108 (25.6%)       | 44 (21.1%)           | 1.09 (0.94, 1.27)      |         |
| 30–34                                                              | 115 (27.3%)       | 62 (29.7%)           | Reference              |         |
| ≥35                                                                | 123 (29.1%)       | 86 (41.1%)           | 0.91 (0.77, 1.06)      |         |
| <b>Pre-existing medical conditions</b>                             |                   |                      |                        |         |
| Pre-existing hypertension                                          | 87 (20.6%)        | 57 (27.3%)           | 0.88 (0.76, 1.02)      | 0.076   |
| Diabetes mellitus                                                  | 9 (2.1%)          | 10 (4.8%)            | 0.70 (0.44, 1.13)      | 0.113   |
| Venous thromboembolism                                             | 2 (0.5%)          | 4 (1.9%)             | -                      | 0.097   |
| <b>Nulliparous</b>                                                 |                   |                      |                        |         |
| Singleton pregnancy                                                | 298 (70.6%)       | 121 (57.9%)          | 1.22 (1.07, 1.38)      | 0.002   |
| Previous gestational hypertension                                  | 396 (93.8%)       | 182 (87.1%)          | 1.40 (1.06, 1.85)      | 0.006   |
| Gestational age at enrolment                                       | 60 (14.2%)        | 52 (24.9%)           | 0.84 (0.69, 1.02)      | 0.001   |
| Blood pressure                                                     | 26.9 [25.3, 28.0] | 26.6 [25.1, 27.9]    | -                      | 0.098   |
| Peak sBP                                                           | 180 [168, 193]    | 168 [158, 180]       | -                      | <0.001  |
| Peak dBP                                                           | 107 [100, 114]    | 100 [95, 109]        | -                      | <0.001  |
| sBP ≥160 or dBP ≥110 mmHg                                          | 388 (91.9%)       | 157 (75.1%)          | 1.80 (1.38, 2.35)      | <0.001  |
| Proteinuria                                                        | 408 (96.7%)       | 190 (90.9%)          | 1.61 (1.08, 2.40)      | 0.004   |
| ≥3+ on dipstick or ≥3g/d                                           | 335 (79.4%)       | 127 (60.8%)          | 1.41 (1.20, 1.65)      | <0.001  |
| <b>Maternal Interventions prescribed</b>                           |                   |                      |                        |         |
| Bedrest                                                            | 311 (73.7%)       | 165 (78.9%)          | 0.91 (0.81, 1.03)      | 0.179   |
| Interventionist care <sup>a</sup>                                  | 111 (26.3%)       | 15 (7.2%)            | 1.43 (1.30, 1.57)      | <0.001  |
| Maternal transport prior to delivery                               | 268 (63.5%)       | 80 (38.3%)           | 1.42 (1.25, 1.60)      | <0.001  |
| Any antihypertensive therapy                                       | 388 (91.9%)       | 187 (89.5%)          | 1.11 (0.89, 1.38)      | 0.380   |
| Antenatal corticosteroids                                          | 376 (89.1%)       | 156 (74.6%)          | 1.52 (1.22, 1.89)      | <0.001  |
| <b>Progress after admission &amp; outcomes</b>                     |                   |                      |                        |         |
| Severe maternal complications (one/more) <sup>b</sup>              | 163 (38.6%)       | 59 (28.2%)           | 1.16 (1.04, 1.29)      | 0.013   |
| Fetal syndrome of pre-eclampsia (one/more)                         | 271 (64.2%)       | 149 (71.3%)          | 0.90 (0.81, 1.01)      | 0.09    |
| Abnormal umbilical artery Doppler                                  | 116 (27.5%)       | 72 (34.4%)           | -                      | 0.089   |
| Oligohydramnios                                                    | 51 (12.1%)        | 29 (13.9%)           | -                      | 0.611   |
| Birthweight <10 <sup>th</sup> centile                              | 130 (30.8%)       | 92 (44.0%)           | -                      | 0.001   |
| Stillbirth                                                         | 48 (11.4%)        | 28 (13.4%)           | -                      | 0.545   |
| Delivered on 1 <sup>st</sup> admission                             | 372 (88.2%)       | 143 (68.4%)          | -                      | <0.001  |
| <b>Indication for delivery</b>                                     |                   |                      |                        |         |
| Uncontrolled hypertension                                          | 169 (40.0%)       | 81 (38.8%)           | 1.02 (0.91, 1.14)      | 0.821   |
| Maternal pre-eclampsia symptoms                                    | 338 (80.1%)       | 75 (35.9%)           | -                      | <0.001  |
| Other maternal signs or abnormal pre-eclampsia lab results         | 275 (65.2%)       | 55 (26.3%)           | 3.33 (2.48, 4.46)      | <0.001  |
| Latency, enrolment to delivery (d)                                 | 3.0 [1.0, 7.0]    | 3.0 [11.0, 34.0]     | -                      | <0.001  |
| Gestational age at delivery (wk)                                   | 27.7 [26.0, 28.7] | 28.7 [27.0, 31.6]    | -                      | <0.001  |
| <b>Mode of delivery</b>                                            |                   |                      |                        |         |
| Vaginal                                                            | 76 (18.0%)        | 55 (26.3%)           | 0.84 (0.72, 0.98)      | 0.021   |
| Caesarean                                                          | 346 (82.0%)       | 155 (74.2%)          | 1.18 (1.01, 1.38)      | 0.029   |
| Spontaneous labour                                                 | 8 (1.9%)          | 24 (11.5%)           | 0.49 (0.29, 0.83)      | <0.001  |
| Neonatal death prior to or during NICU admission                   | 32 (7.6%)         | 13 (6.2%)            | -                      | 0.644   |

Data presented as N(%) or median [IQR]

dBP (diastolic blood pressure), NICU (neonatal intensive care unit), sBP (systolic blood pressure), wk (weeks)

<sup>a</sup> Pregnancies that were not expectantly managed.

<sup>b</sup> See Table B in [S2 File](#) for details of severe maternal complications.

<https://doi.org/10.1371/journal.pone.0189966.t001>

**Table 2. Determinants included in the final model for magnesium sulphate use in all pre-eclampsia<sup>a</sup>.**

| Determinants                                                       | Adjusted RR [95% CI] | PAR% [95% CI]        |
|--------------------------------------------------------------------|----------------------|----------------------|
| <b>Demographic and clinical characteristics in index pregnancy</b> |                      |                      |
| Maternal age (yr)                                                  |                      |                      |
| ≤24                                                                | 1.11 [1.05, 1.17]    | 1.42 [-0.55, 2.88]   |
| 25–29                                                              | 1.03 [0.96, 1.11]    | 0.73 [-3.42, 3.15]   |
| 30–34                                                              | Reference            | Reference            |
| ≥35                                                                | 1.01 [0.92, 1.11]    | 0.35 [-5.05, 3.95]   |
| Pre-existing hypertension                                          | 0.93 [0.86, 0.997]   | -1.82 [-4.79, 0.85]  |
| Nulliparity                                                        | 1.08 [1.00, 1.16]    | 4.88 [-2.32, 11.61]  |
| Singleton pregnancy                                                | 1.23 [0.99, 1.53]    | 17.38 [-3.34, 38.03] |
| <b>Pre-eclampsia severity criteria</b>                             |                      |                      |
| Severe hypertension (sBP ≥160 or dBP ≥110)                         | 1.34 [1.08, 1.67]    | 21.92 [9.27, 35.99]  |
| Heavy proteinuria (≥3+ or ≥3.0g/d)                                 | 1.12 [1.01, 1.24]    | 7.82 [0.18, 17.12]   |
| Delivery for maternal symptoms or sign(s) of pre-eclampsia         | 2.73 [1.30, 5.72]    | 48.67 [41.40, 56.36] |
| Severe maternal complications                                      | 1.02 [0.95, 1.10]    | 0.86 [-2.16, 3.86]   |
| Fetal syndrome of pre-eclampsia <sup>b</sup>                       | 0.94 [0.89, 0.99]    | -4.58 [-11.28, 2.02] |
| <b>Maternal interventions prescribed</b>                           |                      |                      |
| Maternal transport prior to delivery                               | 1.22 [1.12, 1.32]    | 9.87 [4.63, 15.00]   |
| Interventionist care                                               | 1.21 [1.17, 1.25]    | 3.41 [1.92, 4.95]    |
| Antenatal corticosteroids                                          | 1.31 [1.09, 1.58]    | 20.01 [9.78, 32.39]  |
| Spontaneous labour initiation                                      | 0.72 [0.26, 2.02]    | -2.00 [-7.83, 0.48]  |

BP (blood pressure), dBP (diastolic BP), PAR% (population attributable risk), RR (relative risk), sBP (systolic BP)

<sup>a</sup> Variables highlighted in yellow demonstrated significant, independent associations with magnesium sulphate use.

<sup>b</sup> Includes one/more of abnormal Doppler of umbilical artery, oligohydramnios, intrauterine fetal growth restriction, birthweight <10<sup>th</sup> centile, and stillbirth.

<https://doi.org/10.1371/journal.pone.0189966.t002>

## Discussion

### Summary of results

In a large cohort of women with pre-eclampsia who were hospitalized at <29 weeks to Canadian tertiary perinatal centres, magnesium sulphate was used suboptimally for eclampsia prophylaxis. Even among those with serious maternal complications that constitute indications for delivery and meet all international criteria for ‘severe’ pre-eclampsia, magnesium sulphate was administered in 75.3% (131/174) of cases. Magnesium sulphate for eclampsia prophylaxis was more likely to be administered when: (i) antenatal corticosteroids had also been administered; (ii) delivery was indicated based on maternal symptoms or signs, or there was severe hypertension or heavy proteinuria; or (iii) the clinician had been managing the pre-eclampsia for a shorter period of time and was proceeding with interventionist care. The model was essentially unchanged in sensitivity analyses, including those that added into the model the Canadian definition of ‘severe’ pre-eclampsia, and singleton pregnancy replacing heavy proteinuria in analyses where it was excluded, though both of these are unmodifiable clinical factors.

## How the results compare with the existing literature

Underutilization of magnesium sulphate among women with ‘severe’ pre-eclampsia is consistent with other studies, whether they be single-centre studies in Canada [16] or multicentre international studies [12]. Variation in opinion about what constitutes ‘severe’ pre-eclampsia is reflected in between-protocol variation in 22 Canadian tertiary hospitals and within-hospital differences in protocol and practice [17].

The seminal Magpie Trial that demonstrated the effectiveness of magnesium sulphate for eclampsia prevention when clinicians focussed on treating women with symptoms of ‘imminent eclampsia’, severe hypertension, or heavy proteinuria [2]. Our results suggest that clinicians are heeding maternal symptoms and severe hypertension, but there is room for improvement. Also, clinicians appear to be influenced by additional factors, such as maternal signs other than severe hypertension as indications for delivery, medication (concomitant administration of antenatal corticosteroids), transport prior to delivery, and interventionist care. Further, although singleton pregnancy was not always a significant result, the high PAR% indicates that clinicians may also be influenced by it.

## Strengths and limitations

The strength of this study includes a large population dataset with representation from 16 tertiary centres across Canada. As well, because the outcome was common (i.e., the majority received magnesium sulphate), we were able to directly estimate the relative risk. However, there are also limitations to our study. First, there were variables with uncertain time points, such as peak BP measurements and proteinuria; however, exclusion of these factors from modelling did not change the significance of the other factors in the final model, and restricting the model to intrapartum and postpartum delivery had lower power. Also, the results are based on a high-risk population of women with pre-eclampsia who were admitted to hospital at <29 weeks; although it is possible that our overall rates of use may be higher than rates of use at term, we do not expect that clinical factors associated with magnesium sulphate would vary with gestational age.

## Conclusions

Most women with pre-eclampsia are being treated with magnesium sulphate for eclampsia prevention. As in Magpie, women are identified, although not in optimal numbers, based on symptoms and severe hypertension, but clinicians are using additional factors on which to base treatment decisions. Future work should focus on which women with pre-eclampsia may benefit most from magnesium sulphate if the drug is not administered to all women with pre-eclampsia for reasons of cost (in all settings) or drug availability (in under-resourced settings).

## Supporting information

**S1 File.** CPN dataset for analysis.  
(CSV)

**S2 File.** Table A. Definitions of adverse conditions and severe complications of pre-eclampsia in relevant SOGC guidelines.

Table B. Details of serious maternal complications according to severity of pre-eclampsia (SOGC definition) and use of magnesium sulphate or not.

Table C. Sensitivity analyses of determinants included in the final model for magnesium sulphate use in all pre-eclampsia as defined by 2014 SOGC Guidelines.

Table D. Sensitivity analyses using severe antihypertensive therapy to define severe

hypertension.

Table E. Sensitivity analyses excluding severe hypertension and heavy proteinuria from the model.

Table F. Sensitivity analyses restricting to intrapartum and postpartum administration of magnesium sulphate.

(DOC)

## Acknowledgments

An abstract related to the contents of this manuscript was presented at the XIX World Congress of the International Society for the Study of Hypertension in Pregnancy (ISSHP), in New Orleans, US in October 2014.

We would like to thank Jennifer Hutcheon for her guidance and helpful review of the analyses and interpretation. We also thank the members of the CPN collaborative group:

**Steering Committee:** Laura A. Magee (St. George's University of London, London UK), Robert Liston (University of British Columbia, Vancouver BC), Victoria Allen (Dalhousie University, Halifax NS), Mark Ansermino (University of British Columbia, Vancouver BC), François Audibert (Université de Montréal, Montreal QC), Rollin Brant (University of British Columbia, Vancouver BC), Emmanuel Bujold (Université Laval, Québec QC), Joan Crane (Memorial University of Newfoundland, St. John's NF), Nestor Demianczuk (University of Alberta, Edmonton AB), KS Joseph (University of British Columbia, Vancouver BC), Jean-Marie Moutquin (Université de Sherbrooke, Sherbrooke QC), Bruno Piedboeuf (Université Laval, Québec QC), Graeme Smith (Queen's University at Kingston, Kingston ON), Peter von Dadelszen (St. George's University of London, London UK), Mark Walker (University of Ottawa, Ottawa ON), Wendy Whittle (University of Toronto, Toronto ON)

**Database programmers, analysts, and coordinator:** Larry Li, Tang Lee, Dane A. De Silva

**CPN Site Investigators:** Laura A. Magee (BC Women's Hospital & Health Centre, Vancouver BC), Jerome Dansereau (Victoria General Hospital, Victoria BC), Carmen Young (Royal Alexandra Hospital, Edmonton AB), Stephen Wood (Foothills Medical Centre, Calgary AB), Femi Olatunbosun (Royal University Hospital, Saskatoon SK), George Carson, (Regina General Hospital, Regina SK), Graeme Smith (Kingston General Hospital, Kingston ON), Renato Natale (London Health Sciences Centre, London ON), Wendy Whittle (Mount Sinai Hospital, Toronto ON), Mark Walker (The Ottawa Hospital, Ottawa ON), Francois Audibert (Centre Hospitalier Universitaire Sainte-Justine, Montréal QC), Jean-Charles Pasquier (Centre Hospitalier Universitaire de Sherbrooke, Sherbrooke QC), Emmanuel Bujold (Centre Hospitalier de L'Université Laval, Québec City QC), Victoria Allen (IWK Health Centre, Halifax NS), Joan Crane (Women's Health Program, Eastern Health, St. John's NL)

## Author Contributions

**Conceptualization:** Dane A. De Silva, Peter von Dadelszen.

**Data curation:** Peter von Dadelszen, the Canadian Perinatal Network (CPN) Collaborative Group, Laura A. Magee.

**Formal analysis:** Dane A. De Silva, Lily Proctor, Meghan McCoach, Tang Lee.

**Funding acquisition:** Peter von Dadelszen, Laura A. Magee.

**Investigation:** Dane A. De Silva, Peter von Dadelszen, the Canadian Perinatal Network (CPN) Collaborative Group, Laura A. Magee.

**Methodology:** Dane A. De Silva, Laura A. Magee.



**Project administration:** Peter von Dadelszen, the Canadian Perinatal Network (CPN) Collaborative Group, Laura A. Magee.

**Resources:** Peter von Dadelszen, the Canadian Perinatal Network (CPN) Collaborative Group, Laura A. Magee.

**Supervision:** Peter von Dadelszen, Laura A. Magee.

**Writing – original draft:** Dane A. De Silva, Laura A. Magee.

**Writing – review & editing:** Dane A. De Silva, Lily Proctor, Peter von Dadelszen, Meghan McCoach, Tang Lee.

## References

1. The Eclampsia Trial Collaborative Group. Which anticonvulsant for women with eclampsia? Evidence from the Collaborative Eclampsia Trial. *Lancet* 1995; 345(8963):1455–1463. PMID: [7769899](#)
2. Altman D, Carroli G, Duley L, Farrell B, Moodley J, Neilson J, et al. Do women with pre-eclampsia, and their babies, benefit from magnesium sulphate? The Magpie Trial: a randomised placebo-controlled trial. *Lancet* 2002 Jun 1; 359(9321):1877–1890. PMID: [12057549](#)
3. Simon J, Gray A, Duley L, Magpie Trial Collaborative Group. Cost-effectiveness of prophylactic magnesium sulphate for 9996 women with pre-eclampsia from 33 countries: economic evaluation of the Magpie Trial. *BJOG* 2006 Feb; 113(2):144–151. <https://doi.org/10.1111/j.1471-0528.2005.00785.x> PMID: [16411990](#)
4. World Health Organization. WHO recommendations for prevention and treatment of pre-eclampsia and eclampsia. 2011. Available from: [apps.who.int/iris/bitstream/10665/44703/1/9789241548335\\_eng.pdf](https://apps.who.int/iris/bitstream/10665/44703/1/9789241548335_eng.pdf).
5. Gillon TE, Pels A, von Dadelszen P, MacDonell K, Magee LA. Hypertensive disorders of pregnancy: a systematic review of international clinical practice guidelines. *PLoS One* 2014 Dec 1; 9(12):e113715. <https://doi.org/10.1371/journal.pone.0113715> PMID: [25436639](#)
6. Helewa ME, Burrows RF, Smith J, Williams K, Brain P, Rabkin SW. Report of the Canadian Hypertension Society Consensus Conference: 1. Definitions, evaluation and classification of hypertensive disorders in pregnancy. *CMAJ* 1997 Sep 15; 157(6):715–725. PMID: [9307560](#)
7. Moutquin JM, Garner PR, Burrows RF, Rey E, Helewa ME, Lange IR, et al. Report of the Canadian Hypertension Society Consensus Conference: 2. Nonpharmacologic management and prevention of hypertensive disorders in pregnancy. *CMAJ* 1997 Oct 1; 157(7):907–919. PMID: [9327800](#)
8. Rey E, LeLorier J, Burgess E, Lange IR, Leduc L. Report of the Canadian Hypertension Society Consensus Conference: 3. Pharmacologic treatment of hypertensive disorders in pregnancy. *CMAJ* 1997 Nov 1; 157(9):1245–1254. PMID: [9361646](#)
9. Magee LA, Helewa M, Moutquin JM, von Dadelszen P, Hypertension Guideline Committee, Strategic Training Initiative in Research in the Reproductive Health Sciences (STIRRHS) Scholars. Diagnosis, evaluation, and management of the hypertensive disorders of pregnancy. *J Obstet Gynaecol Can* 2008 Mar; 30(3 Suppl):S1–48. [https://doi.org/10.1016/S1701-2163\(16\)32776-1](https://doi.org/10.1016/S1701-2163(16)32776-1) PMID: [18817592](#)
10. Magee LA, Pels A, Helewa M, Rey E, von Dadelszen P, SOGC Hypertension Guideline Committee. Diagnosis, evaluation, and management of the hypertensive disorders of pregnancy: executive summary. *J Obstet Gynaecol Can* 2014 Jul; 36(7):575–576.
11. Magee LA, Pels A, Helewa M, Rey E, von Dadelszen P, Canadian Hypertensive Disorders of Pregnancy (HDP) Working Group. Diagnosis, evaluation, and management of the hypertensive disorders of pregnancy. *Pregnancy Hypertens* 2014 Apr; 4(2):105–145. <https://doi.org/10.1016/j.preghy.2014.01.003> PMID: [26104418](#)
12. von Dadelszen P, Payne B, Li J, Ansermino JM, Broughton Pipkin F, Cote AM, et al. Prediction of adverse maternal outcomes in pre-eclampsia: development and validation of the fullPIERS model. *Lancet* 2011 Jan 15; 377(9761):219–227. [https://doi.org/10.1016/S0140-6736\(10\)61351-7](https://doi.org/10.1016/S0140-6736(10)61351-7) PMID: [21185591](#)
13. Magee LA, von Dadelszen P, Allen VM, Ansermino JM, Audibert F, Barrett J, et al. The Canadian Perinatal Network: a national network focused on threatened preterm birth at 22 to 28 weeks' gestation. *J Obstet Gynaecol Can* 2011 Feb; 33(2):111–120. [https://doi.org/10.1016/S1701-2163\(16\)34795-8](https://doi.org/10.1016/S1701-2163(16)34795-8) PMID: [21352628](#)
14. Morgenstern H. Attributable fractions. In: Boslaugh S, editor. *Encyclopedia of Epidemiology*, Volume 2 Thousand Oaks, CA: Sage Publications; 2008. p. 56–63.

15. Rockhill B, Newman B, Weinberg C. Use and misuse of population attributable fractions. *Am J Public Health* 1998 Jan; 88(1):15–19. PMID: [9584027](#)
16. Girard P, Quirion A, Bureau Y, Sauvé N. Magnesium sulphate for eclampsia prevention: Quality of care evaluation in a tertiary centre in Québec, Canada. *Obstetric Medicine: The Medicine of Pregnancy* 2014 June 01; 7(2):71–76.
17. De Silva DA, Sawchuck D, von Dadelszen P, Basso M, Synnes AR, Liston RM, et al. Magnesium Sulphate for Eclampsia and Fetal Neuroprotection: A Comparative Analysis of Protocols Across Canadian Tertiary Perinatal Centres. *J Obstet Gynaecol Can* 2015 Nov; 37(11):975–987. PMID: [26629718](#)
